# Supplementary material for: An excellent humidity sensor based on In–SnO2 loaded mesoporous graphitic carbon nitride
Source: Royal Society of Chemistry journal article supplement (doi:10.1039/c7ta02860a), 2017-01-01
Supplement: c7ta02860a1.pdf [file c7ta02860a1.pdf]

**Note added after first publication:** this version of the Electronic Supplementary Information published on 21<sup>st</sup> September 2020 replaces the original version published on 5<sup>th</sup> June 2017, to address errors in Fig. S1 (see Correction DOI: 10.1039/C9TA90268F for further details).

## Electronic Supplementary Information (ESI) for

### An Excellent Humidity Sensor based on In-SnO<sub>2</sub> Loaded Mesoporous Graphitic Carbon Nitride

Ritu Malik<sup>a</sup>, Vijay K. Tomer<sup>b,\*</sup>, Vandna Chaudhary<sup>c</sup>, Manjeet S. Dahiya<sup>d</sup>, Anshu Sharma<sup>e</sup>,  
S.P. Nehra<sup>c</sup>, Surender Duhan<sup>d</sup>, Kamalakannan Kailasam<sup>b,\*</sup>

<sup>a</sup> Department of Applied Physics, Mahavir Swami Institute of Technology, Sonapat, Haryana-131001

<sup>b</sup> Institute of Nano Science & Technology (INST), Mohali, Punjab, 160062 INDIA

<sup>c</sup> Center of Excellence for Energy and Environmental Studies, D.C.R. University of Science & Technology, Murthal, Sonapat, Haryana, 131039 INDIA

<sup>d</sup> Department of Materials Science & Nanotechnology, D.C.R. University of Science & Technology, Murthal, Sonapat, Haryana, 131039 INDIA

<sup>e</sup> Department of Physics, Indian Institute of Technology Delhi, New Delhi, 110016, India

\* Corresponding author

E-mail: [vjtomergmailcom](mailto:vjtomergmailcom) (Vijay K. Tomer)

[kamal@inst.ac.in](mailto:kamal@inst.ac.in) (Kamalakannan Kailasam)

## **Fabrication and performance test of humidity sensors**

The procedure for sensor fabrication and %RH sensing measurements was similar to that described in our earlier reported work.<sup>1,2</sup> In a typical experimental procedure, the ceramic substrate (13.4mm x 7mm x 0.5mm) consisting of 5 pairs of Ag-Pd interdigitated electrodes were utilized to measure humidity response. To prepare the sensors, a paste of 1:20 weight ratio of sample/ethanol was drop coated on the substrate (between the Ag-Pd tracks) using a 10  $\mu$ L pipette, where after, the sample coated substrate was left for drying in oven for 2h at 60 °C to form a sensing film of thickness of  $\sim$ 10  $\mu$ m. The humidity sensing experiments were performed at 25 °C in controlled %RH environments generated by using self made air-tight chambers containing saturated aqueous salts solution of high purity salts of LiCl (11 %RH), MgCl<sub>2</sub>•6H<sub>2</sub>O (33 %RH), MgNO<sub>3</sub>•4H<sub>2</sub>O (54 %RH), NaCl (75 %RH), KCl (84 %RH) and K<sub>2</sub>SO<sub>4</sub> (98 %RH).<sup>1</sup> During the measurements, the sample coated substrate was put sequentially into the six chambers with different %RH for the uptake of water molecules and impedance changes were measured using a two-probe LCR Hitester (Hioki 3532-50). A 1V AC voltage with frequency ranging from 50 Hz to 5 kHz was applied. The effects of exposing the sensor to laboratory environmental conditions were minimized by quickly completing the chamber change process within 1 s.

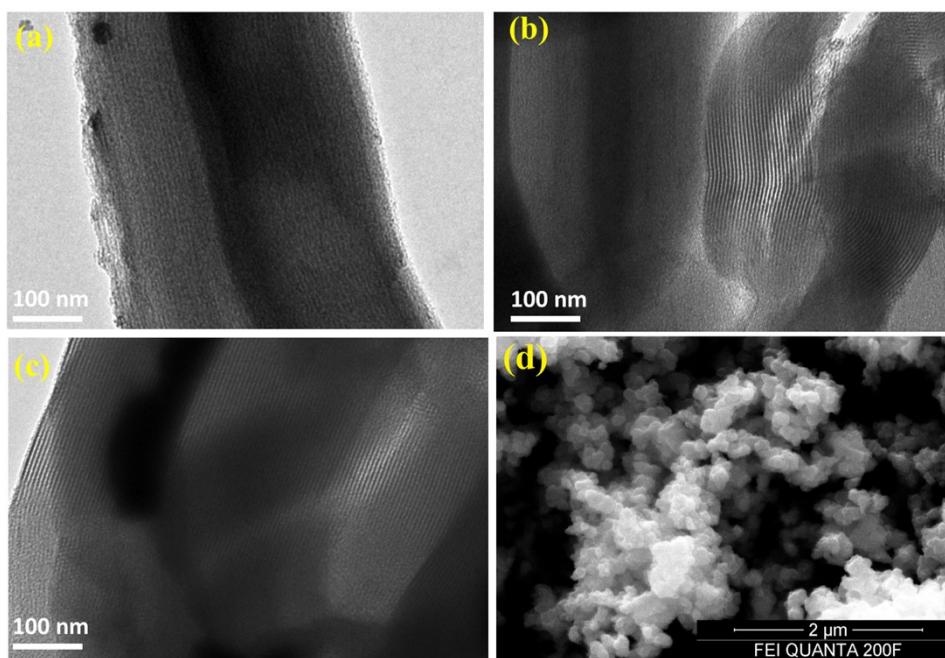

**Figure S1:** (a-c) Low resolution TEM image and (d) SEM image showing morphology and microstructure of nanocasted mesoporous In-SnO<sub>2</sub>/meso-CN nanocomposite

**References:**

1. V. K. Tomer, S. T. Nishanthi, S. Gahlot and K. Kailasam, *Nanoscale*, 2016, **8**, 19794–19803.
2. V. K. Tomer and S. Duhan, *J. Mater. Chem. A*, 2016, **4**, 1033–1043.
